# Supplementary material
Source: Copernicus journal article supplement (doi:10.5194/bg-23-4793-2026)
Supplement: Supplementary file 1 [file bg-23-4793-2026-supplement.pdf]

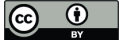

*Supplement of*

**New insights into the primary production and the structure of the phytoplankton community in the South Indian Ocean using size fractionation experiments**

**Valentin Deteix et al.**

*Correspondence to:* Valentin Deteix ([valentin.deteix@locean.ipsl.fr](mailto:valentin.deteix@locean.ipsl.fr)) and Céline Ridame ([celine.ridame@locean.ipsl.fr](mailto:celine.ridame@locean.ipsl.fr))

The copyright of individual parts of the supplement might differ from the article licence.

## 1 **S1. Choice of depth criterion for the productive layer in integration computations**

2 For decades, oceanographers and marine biogeochemists have defined the depth of the  
3 productive layer ( $Z_{PL}$ ) operationally. The most common criteria relies on irradiance from  
4 downcast profiles of photosynthetically active radiation (PAR), where  $Z_{PL}$  corresponds to the  
5 depth at which PAR is reduced to 1% of its surface value (Morel and Berthon, 1989; Ryther,  
6 1956). Even though this definition has endured, it may not represent best the productive layer,  
7 as significant net primary production fluxes and chlorophyll *a* concentrations were previously  
8 reported below the 1% light level (*e.g.* Cavagna et al., 2015; Laws et al., 2014). Recently, Marra  
9 et al. (2023) compared several parameters to define  $Z_{PL}$  and concluded that the depth of the  
10 bottom of the fluorescence maximum was a good indicator of  $Z_{PL}$  and could be used over a  
11 broader range of trophic conditions. To define it, they used the intersection of two regression  
12 lines: one from the bottom of the profile and the other from the depth of the subsurface  
13 fluorescence maximum to the depth where fluorescence is at background. However, it was not  
14 evident in their example whether the intersection was clearly at the top of the fluorescence  
15 background or not. As acknowledged in their discussions: “Estimating this depth objectively is  
16 a difficult problem”.

17 Based on this assessment, we defined our own criteria for the depth of bottom of the  
18 fluorescence maximum ( $Z_{FL}$ ). Starting from the bottom of the fluorescence background, the  
19 objective was to determine the depth at which the fluorescence profile stands out from the  
20 background. We determined  $Z_{FL}$  to be the depth at which the fluorescence reaches the mean +  
21 5 times the standard deviation of background fluorescence. The range for the background  
22 fluorescence values extended from 200 to 300 m for most of the SOCARB stations, but this  
23 range was adapted following each profile. Nevertheless, because irradiance is a more common  
24 feature to estimate  $Z_{PL}$ , we wanted to see if a specific irradiance value to define  $Z_{PL}$  could tend  
25 to  $Z_{FL}$ . When computing the depth of several euphotic layers – PAR at which PAR is reduced  
26 to 1%, 0.1% or 0.01% of its surface value:  $Z_{EL1\%}$ ,  $Z_{EL0.1\%}$  and  $Z_{EL0.01\%}$  – we noted that  $Z_{FL}$   
27 tended the most to  $Z_{EL0.01\%}$  (Table S1a, Fig. S1). Furthermore, when comparing integrated total  
28 chlorophyll *a* for the total fraction ( $TChla_{TOTAL}$ ) and for the size classes ( $TChla_{PICO}$ ,  $TChla_{NANO}$ ,  
29  $TChla_{MICRO}$ ) between  $Z_{FL}$  with  $Z_{EL1\%}$ ,  $Z_{EL0.1\%}$  and  $Z_{EL0.01\%}$  (Table S1b), integrated  $TChla$  with  
30  $Z_{FL}$  exhibited the lowest relative differences with  $Z_{EL0.01\%}$  (Table S1c), which justified our  
31 choice of  $Z_{EL0.01\%}$  as the depth that best represents the depth of the productive layer (Table S1c).

32

## 33 **S2. Use of primary production fluxes below the 1% surface PAR**

34 Samples for NPP – and pigments – were collected at six depths between the surface (~  
35 10 m) and 200 m maximum. This range encompasses the euphotic layer at 1% of surface PAR,  
36 with NPP samples collected below  $Z_{EL1\%}$ . However, the set of available blue filters, used in the  
37 24h incubations to simulate an irradiance level as close as possible to the sampled depth, ranged  
38 from 75 to 1% attenuation. This implies that for samples collected below  $Z_{EL1\%}$ , simulated  
39 irradiances during incubations were higher compared to *in situ* irradiance, and potentially  
40 leading to overestimated NPP fluxes below  $Z_{EL1\%}$ . We calculated the relative differences in  
41 integrated NPP over the  $Z_{EL0.01\%}$  for the total fraction and the size classes, computed using all  
42 samples (0 samples excluded out of 12 stations) and computed using only the samples located  
43 above or close to  $Z_{EL1\%}$  (20 samples excluded out of 72). The relative differences across the  
44 entire dataset were on average  $-5\% \pm 16\%$ ; more specifically,  $-6\% \pm 13\%$  for the total fraction;  
45  $-1\% \pm 15\%$  for the pico-;  $-3\% \pm 14\%$  for the nano- and  $-9\% \pm 20\%$  for the microphytoplankton  
46 size fraction (Table S2). These average relative differences, which were negative and close to  
47 0%, justified our choice to keep all NPP samples for the depth integration calculations.

## 48 **S3. Detailed analysis of hydrographic fronts over the study area**

49 On the north-south outward transect, the subtropical front (STF) was crossed between  
50 41.20 and 41.50 °S and associated with a first and sharp decrease of SST and SSS ( $\Delta SST = 6.62$   
51 °C per 100 km<sup>-1</sup>;  $\Delta SSS = 1.883$  PSU per 100 km<sup>-1</sup>). It was followed closely by the subantarctic  
52 front (SAF), crossed between 42.55 and 43.25°S and described with a second and sharp  
53 decrease of SST and SSS ( $\Delta SST = 6.05$  °C per 100 km<sup>-1</sup>;  $\Delta SSS = 1.370$  PSU per 100 km<sup>-1</sup>).  
54 The polar front (PF) was crossed between 52.54 and 52.82 °S and associated with a smaller  
55 SST gradient ( $\Delta SST = 2.12$  °C per 100 km<sup>-1</sup>). On the south-north return transect, the southern  
56 branch of the PF was crossed twice: once at station O10 (50.67 °S) where the temperature  
57 minimum at 200 m reached 2°C, and a second time between E (48.80 °S) and 47.18 °S ( $\Delta SST$   
58 = 1.71 °C per 100 km<sup>-1</sup>). The SAF was crossed between 46.27 and 45.65 °S ( $\Delta SST = 5.28$  °C  
59 per 100 km<sup>-1</sup>;  $\Delta SSS = 1.042$  PSU per 100 km<sup>-1</sup>), and the STF between 36.33 and 35.75 °S  
60 ( $\Delta SST = 3.58$  °C per 100 km<sup>-1</sup>;  $\Delta SSS = 0.815$  PSU per 100 km<sup>-1</sup>).

## 61 **References**

62 Cavagna, A. J., Fripiat, F., Elskens, M., Mangion, P., Chirurgien, L., Closset, I., Lasbleiz, M.,  
63 Florez-Leiva, L., Cardinal, D., Leblanc, K., Fernandez, C., Lefèvre, D., Oriol, L., Blain, S.,  
64 Quéguiner, B., and Dehairs, F.: Production regime and associated N cycling in the vicinity of

65 Kerguelen Island, Southern Ocean, *Biogeosciences*, 12, 6515–6528, [https://doi.org/10.5194/bg-](https://doi.org/10.5194/bg-12-6515-2015)  
66 12-6515-2015, 2015.

67 Laws, E. A., Letelier, R. M., and Karl, D. M.: Estimating the compensation irradiance in the  
68 ocean: The importance of accounting for non-photosynthetic uptake of inorganic carbon, *Deep*  
69 *Sea Research Part I: Oceanographic Research Papers*, 93, 35–40,  
70 <https://doi.org/10.1016/j.dsr.2014.07.011>, 2014.

71 Marra, J. F., Chamberlin, W. S., Knudson, C. A., Rhea, W. J., and Ho, C.: Parameters for the  
72 depth of the ocean's productive layer, *Frontiers in Marine Science*, 10,  
73 <https://doi.org/10.3389/fmars.2023.1052307>, 2023.

74 Morel, A. and Berthon, J.-F.: Surface pigments, algal biomass profiles, and potential production  
75 of the euphotic layer: Relationships reinvestigated in view of remote-sensing applications,  
76 *Limnology and Oceanography*, 34, 1545–1562, <https://doi.org/10.4319/lo.1989.34.8.1545>,  
77 1989.

78 Ryther, J. H.: Photosynthesis in the Ocean as a Function of Light Intensity, *Limnology and*  
79 *Oceanography*, 1, 61–70, <https://doi.org/10.4319/lo.1956.1.1.0061>, 1956.

80

81 **Table S1.** (a) Depths of the four different criteria used to integrate biogeochemical parameters  
82 (NPP): bottom of the fluorescence maximum ( $Z_{FL}$ ), bottom of the euphotic layer for 1% ( $Z_{EL1\%}$ ),  
83 0.1% ( $Z_{EL0.1\%}$ ) and 0.01% ( $Z_{EL0.01\%}$ ) of the surface PAR value. Integrated TChla ( $\text{mg m}^{-2}$ ) for  
84 the total fraction and the size classes following four different depth criteria. (c) Relative  
85 differences between integrated TChla over the  $Z_{FL}$  with those integrated over the  $Z_{EL1\%}$ , the  
86  $Z_{EL0.1\%}$  and the  $Z_{EL0.01\%}$ .

|                                                                         | O2   | O3   | O16  | O14  | O6   | O7   | O9   | O12  | E    | A3   | O10  | O11  |
|-------------------------------------------------------------------------|------|------|------|------|------|------|------|------|------|------|------|------|
| <b>(a)</b>                                                              |      |      |      |      |      |      |      |      |      |      |      |      |
| <b>Criteria depths [m]</b>                                              |      |      |      |      |      |      |      |      |      |      |      |      |
| $Z_{FL}$                                                                | 160  | 210  | 187  | 153  | 177  | 170  | 164  | 190  | 186  | 202  | 164  | 165  |
| $Z_{EL1\%}$                                                             | 93   | 118  | 90   | 87   | 84   | 82   | 83   | 46   | 63   | 48   | 69   | 101  |
| $Z_{EL0.1\%}$                                                           | 139  | 177  | 136  | 131  | 126  | 123  | 125  | 70   | 94   | 73   | 103  | 152  |
| $Z_{EL0.01\%}$                                                          | 185  | 236  | 181  | 174  | 168  | 164  | 167  | 93   | 125  | 97   | 137  | 203  |
| <b>(b)</b>                                                              |      |      |      |      |      |      |      |      |      |      |      |      |
| <b>Integrated TChla<sub>PICO</sub> [<math>\text{mg m}^{-2}</math>]</b>  |      |      |      |      |      |      |      |      |      |      |      |      |
| $\int \text{TChla}_{PICO}$ over $Z_{FL}$                                | 9.9  | 11.1 | 17.6 | 12.5 | 3.8  | 6.0  | 3.9  | 13.4 | 5.9  | 8.5  | 3.4  | 4.2  |
| $\int \text{TChla}_{PICO}$ over $Z_{EL1\%}$                             | 6.2  | 9.6  | 8.0  | 7.6  | 1.2  | 2.8  | 2.6  | 4.0  | 3.0  | 1.8  | 2.1  | 2.8  |
| $\int \text{TChla}_{PICO}$ over $Z_{EL0.1\%}$                           | 9.6  | 10.8 | 14.6 | 11.2 | 3.4  | 5.1  | 3.5  | 5.9  | 4.4  | 3.0  | 3.1  | 4.0  |
| $\int \text{TChla}_{PICO}$ over $Z_{EL0.01\%}$                          | 10.0 | 11.3 | 17.3 | 13.8 | 3.7  | 6.0  | 3.9  | 8.2  | 5.0  | 5.3  | 3.3  | 4.8  |
| <b>Integrated TChla<sub>NANO</sub> [<math>\text{mg m}^{-2}</math>]</b>  |      |      |      |      |      |      |      |      |      |      |      |      |
| $\int \text{TChla}_{NANO}$ over $Z_{FL}$                                | 11.4 | 14.9 | 9.0  | 11.1 | 19.8 | 23.8 | 13.4 | 18.8 | 14.1 | 28.8 | 10.3 | 11.7 |
| $\int \text{TChla}_{NANO}$ over $Z_{EL1\%}$                             | 6.6  | 12.6 | 4.8  | 7.6  | 10.9 | 13.5 | 10.0 | 8.0  | 8.4  | 10.1 | 6.3  | 9.6  |
| $\int \text{TChla}_{NANO}$ over $Z_{EL0.1\%}$                           | 11.0 | 14.5 | 7.5  | 10.2 | 17.2 | 20.8 | 12.6 | 13.5 | 12.2 | 15.5 | 9.1  | 11.7 |
| $\int \text{TChla}_{NANO}$ over $Z_{EL0.01\%}$                          | 11.6 | 15.3 | 8.8  | 11.9 | 19.5 | 23.7 | 13.4 | 16.7 | 13.1 | 21.3 | 10.0 | 11.8 |
| <b>Integrated TChla<sub>MICRO</sub> [<math>\text{mg m}^{-2}</math>]</b> |      |      |      |      |      |      |      |      |      |      |      |      |
| $\int \text{TChla}_{MICRO}$ over $Z_{FL}$                               | 3.4  | 6.1  | 5.9  | 7.4  | 17.0 | 8.9  | 10.8 | 39.4 | 27.9 | 60.8 | 22.9 | 8.6  |
| $\int \text{TChla}_{MICRO}$ over $Z_{EL1\%}$                            | 1.8  | 5.2  | 4.2  | 6.4  | 9.2  | 3.1  | 8.2  | 20.0 | 15.2 | 21.0 | 13.6 | 6.7  |
| $\int \text{TChla}_{MICRO}$ over $Z_{EL0.1\%}$                          | 3.2  | 6.0  | 5.6  | 7.2  | 15.8 | 7.1  | 10.3 | 28.6 | 22.5 | 30.8 | 20.0 | 8.5  |
| $\int \text{TChla}_{MICRO}$ over $Z_{EL0.01\%}$                         | 3.5  | 6.2  | 5.8  | 7.6  | 16.9 | 8.9  | 10.8 | 33.3 | 24.9 | 39.2 | 22.1 | 8.9  |
| <b>Integrated TChla<sub>TOTAL</sub> [<math>\text{mg m}^{-2}</math>]</b> |      |      |      |      |      |      |      |      |      |      |      |      |
| $\int \text{TChla}_{TOTAL}$ over $Z_{FL}$                               | 24.8 | 32.1 | 32.5 | 31.0 | 40.6 | 38.7 | 28.0 | 71.7 | 48.0 | 98.2 | 36.5 | 24.5 |
| $\int \text{TChla}_{TOTAL}$ over $Z_{EL1\%}$                            | 14.6 | 27.3 | 17.0 | 21.6 | 21.3 | 19.5 | 20.8 | 31.9 | 26.6 | 32.9 | 22.0 | 19.1 |
| $\int \text{TChla}_{TOTAL}$ over $Z_{EL0.1\%}$                          | 23.7 | 31.3 | 27.8 | 28.7 | 36.5 | 33.0 | 26.4 | 48.0 | 39.2 | 49.3 | 32.1 | 24.1 |
| $\int \text{TChla}_{TOTAL}$ over $Z_{EL0.01\%}$                         | 25.1 | 32.8 | 31.9 | 33.3 | 40.1 | 38.5 | 28.1 | 58.2 | 43.1 | 65.7 | 35.4 | 25.5 |
| <b>(c)</b>                                                              |      |      |      |      |      |      |      |      |      |      |      |      |
| <b><math>\Delta</math> of integrated TChla<sub>PICO</sub> [%]</b>       |      |      |      |      |      |      |      |      |      |      |      |      |
| $\Delta (Z_{FL} - Z_{EL1\%})$                                           | -38  | -14  | -55  | -39  | -68  | -53  | -34  | -70  | -49  | -79  | -37  | -34  |
| $\Delta (Z_{FL} - Z_{EL0.1\%})$                                         | -4   | -3   | -17  | -10  | -8   | -16  | -10  | -56  | -26  | -64  | -10  | -5   |
| $\Delta (Z_{FL} - Z_{EL0.01\%})$                                        | 1    | 2    | -2   | 10   | 0    | -1   | 1    | -39  | -16  | -38  | -2   | 14   |
| <b><math>\Delta</math> of integrated TChla<sub>NANO</sub> [%]</b>       |      |      |      |      |      |      |      |      |      |      |      |      |
| $\Delta (Z_{FL} - Z_{EL1\%})$                                           | -42  | -16  | -47  | -31  | -45  | -43  | -25  | -58  | -41  | -65  | -39  | -18  |
| $\Delta (Z_{FL} - Z_{EL0.1\%})$                                         | -4   | -3   | -17  | -7   | -13  | -13  | -6   | -28  | -13  | -46  | -12  | 0    |
| $\Delta (Z_{FL} - Z_{EL0.01\%})$                                        | 1    | 2    | -2   | 7    | -2   | 0    | 0    | -11  | -7   | -26  | -3   | 1    |
| <b><math>\Delta</math> of integrated TChla<sub>MICRO</sub> [%]</b>      |      |      |      |      |      |      |      |      |      |      |      |      |
| $\Delta (Z_{FL} - Z_{EL1\%})$                                           | -46  | -15  | -28  | -14  | -46  | -65  | -23  | -49  | -45  | -66  | -41  | -22  |
| $\Delta (Z_{FL} - Z_{EL0.1\%})$                                         | -6   | -2   | -5   | -3   | -7   | -20  | -4   | -27  | -19  | -49  | -13  | -1   |
| $\Delta (Z_{FL} - Z_{EL0.01\%})$                                        | 4    | 2    | -1   | 3    | -1   | 0    | 0    | -16  | -11  | -36  | -3   | 4    |
| <b><math>\Delta</math> of integrated TChla<sub>TOTAL</sub> [%]</b>      |      |      |      |      |      |      |      |      |      |      |      |      |
| $\Delta (Z_{FL} - Z_{EL1\%})$                                           | -41  | -15  | -48  | -30  | -47  | -50  | -26  | -55  | -44  | -66  | -40  | -22  |
| $\Delta (Z_{FL} - Z_{EL0.1\%})$                                         | -4   | -3   | -15  | -8   | -10  | -15  | -6   | -33  | -18  | -50  | -12  | -1   |
| $\Delta (Z_{FL} - Z_{EL0.01\%})$                                        | 1    | 2    | -2   | 7    | -1   | 0    | 0    | -19  | -10  | -33  | -3   | 4    |

88 **Table S2.** Comparison of integrated net primary production (NPP) following two different  
 89 methods sharing the same depth criterion ( $Z_{EL0.01\%}$ ): the first method [1] remaining usual (0  
 90 samples excluded) and the second method [2] where samples above or close to  $Z_{EL1\%}$  were kept  
 91 to compute the integration (20 samples excluded).

|                                                                                                                                    | O2  | O3   | O16 | O14  | O6   | O7   | O9   | O12  | E    | A3   | O10 | O11 |
|------------------------------------------------------------------------------------------------------------------------------------|-----|------|-----|------|------|------|------|------|------|------|-----|-----|
| <b>Integrated NPP [mgC m<sup>-2</sup> d<sup>-1</sup>]</b>                                                                          |     |      |     |      |      |      |      |      |      |      |     |     |
| [1] Classic method: ∫ PP over $Z_{EL0.01\%}$ (0 samples excluded out of 72)                                                        |     |      |     |      |      |      |      |      |      |      |     |     |
| ∫ PP <sub>PICO</sub>                                                                                                               | 111 | 182  | 117 | 255  | 44   | 54   | 47   | 70   | 41   | 60   | 39  | 34  |
| ∫ PP <sub>NANO</sub>                                                                                                               | 361 | 714  | 109 | 568  | 351  | 430  | 313  | 308  | 408  | 490  | 210 | 271 |
| ∫ PP <sub>MICRO</sub>                                                                                                              | 87  | 277  | 336 | 649  | 669  | 671  | 641  | 3227 | 865  | 1571 | 671 | 233 |
| ∫ PP <sub>TOTAL</sub>                                                                                                              | 559 | 1173 | 562 | 1472 | 1064 | 1155 | 1002 | 3605 | 1314 | 2120 | 921 | 537 |
| <b>Integrated NPP [mgC m<sup>-2</sup> d<sup>-1</sup>]</b>                                                                          |     |      |     |      |      |      |      |      |      |      |     |     |
| [2] Alternative method: ∫ PP over $Z_{EL0.01\%}$ and keeping samples above or close to $Z_{EL1\%}$ (20 samples excluded out of 72) |     |      |     |      |      |      |      |      |      |      |     |     |
| ∫ PP <sub>PICO</sub>                                                                                                               | 139 | 190  | 125 | 255  | 54   | 45   | 56   | 62   | 37   | 57   | 33  | 29  |
| ∫ PP <sub>NANO</sub>                                                                                                               | 452 | 848  | 138 | 568  | 378  | 345  | 341  | 291  | 375  | 458  | 199 | 265 |
| ∫ PP <sub>MICRO</sub>                                                                                                              | 108 | 280  | 385 | 649  | 708  | 814  | 677  | 2524 | 974  | 1319 | 734 | 365 |
| ∫ PP <sub>TOTAL</sub>                                                                                                              | 698 | 1318 | 648 | 1472 | 1141 | 1204 | 1073 | 2877 | 1385 | 1834 | 966 | 659 |
| <b>Δ (∫ NPP<sub>[1]</sub> - ∫ NPP<sub>[2]</sub>) [%]</b>                                                                           |     |      |     |      |      |      |      |      |      |      |     |     |
| ∫ PP <sub>PICO</sub>                                                                                                               | -25 | -4   | -7  | 0    | -24  | 17   | -18  | 11   | 10   | 4    | 15  | 13  |
| ∫ PP <sub>NANO</sub>                                                                                                               | -25 | -19  | -26 | 0    | -8   | 20   | -9   | 5    | 8    | 6    | 5   | 2   |
| ∫ PP <sub>MICRO</sub>                                                                                                              | -24 | -1   | -15 | 0    | -6   | -21  | -6   | 22   | -13  | 16   | -9  | -57 |
| ∫ PP <sub>TOTAL</sub>                                                                                                              | -25 | -12  | -15 | 0    | -7   | -4   | -7   | 20   | -5   | 13   | -5  | -23 |

93 **Table S3.** Relative contributions of each size class to integrated total chlorophyll *a* ( $\int$ TChl*a*)  
 94 and integrated net primary production ( $\int$ NPP) over the  $Z_{EL0.01\%}$ . Stations were grouped  
 95 according to their hydrographic zone and biogeochemical region.

| St.                                  | Zone | Region    | $\int$ TChl <i>a</i> [%] |             |             | $\int$ NPP [%] |             |             |
|--------------------------------------|------|-----------|--------------------------|-------------|-------------|----------------|-------------|-------------|
|                                      |      |           | Pico-                    | Nano-       | Micro-      | Pico           | Nano        | Micro       |
| <i>Subtropical Zone</i>              |      |           |                          |             |             |                |             |             |
| O2                                   | STZ  | LNLC      | 40                       | 46          | 14          | 20             | 65          | 16          |
| O3                                   | STZ  | LNLC      | 35                       | 46          | 19          | 16             | 61          | 24          |
| O16                                  | STZ  | LNLC      | 54                       | 28          | 18          | 21             | 19          | 60          |
| Mean $\pm$ SD                        |      |           | 43 $\pm$ 10              | 40 $\pm$ 11 | 17 $\pm$ 3  | 19 $\pm$ 3     | 48 $\pm$ 25 | 33 $\pm$ 24 |
| <i>Subantarctic Zone</i>             |      |           |                          |             |             |                |             |             |
| O14                                  | SAZ  | HN-LSi-LC | 41                       | 36          | 23          | 17             | 39          | 44          |
| <i>Polar Frontal Zone – offshore</i> |      |           |                          |             |             |                |             |             |
| O6                                   | PFZ  | HN-LSi-LC | 9                        | 49          | 42          | 4              | 33          | 63          |
| O7                                   | PFZ  | HN-LSi-LC | 15                       | 61          | 23          | 5              | 37          | 58          |
| O9                                   | PFZ  | HN-LSi-LC | 14                       | 48          | 38          | 5              | 31          | 64          |
| Mean $\pm$ SD                        |      |           | 13 $\pm$ 3               | 53 $\pm$ 8  | 35 $\pm$ 10 | 4 $\pm$ 0      | 34 $\pm$ 3  | 62 $\pm$ 3  |
| <i>Kerguelen bloom region</i>        |      |           |                          |             |             |                |             |             |
| O12                                  | PFZ  | KER (PFZ) | 14                       | 29          | 57          | 2              | 9           | 90          |
| E                                    | AZ   | KER (AZ)  | 12                       | 30          | 58          | 3              | 31          | 66          |
| A3                                   | AZ   | KER (AZ)  | 8                        | 32          | 60          | 3              | 23          | 74          |
| Mean $\pm$ SD                        |      |           | 11 $\pm$ 3               | 31 $\pm$ 2  | 58 $\pm$ 1  | 3 $\pm$ 1      | 21 $\pm$ 11 | 76 $\pm$ 12 |
| <i>Antarctic Zone – offshore</i>     |      |           |                          |             |             |                |             |             |
| O10                                  | AZ   | HNLC      | 9                        | 28          | 62          | 4              | 23          | 73          |
| O11                                  | AZ   | HNLC      | 19                       | 46          | 35          | 6              | 50          | 43          |
| Mean                                 |      |           | 14                       | 37          | 49          | 5              | 37          | 58          |
| <i>Global study area</i>             |      |           |                          |             |             |                |             |             |
| Mean $\pm$ SD                        |      |           | 23 $\pm$ 16              | 40 $\pm$ 11 | 37 $\pm$ 18 | 9 $\pm$ 7      | 35 $\pm$ 17 | 56 $\pm$ 21 |

96

97 STZ, Subtropical Zone; SAZ, Subantarctic Zone; PFZ, Polar Frontal Zone; AZ, Antarctic Zone;  
 98 KER, Kerguelen bloom; TChl*a*, total chlorophyll *a*; PP, Primary production.

99

100 **Table S4.** Relative contributions of integrated pigments (%) over the Z<sub>EL</sub> 0.01% for each size  
 101 class.

| Pigment                             | O2 | O3 | O16 | O14 | O6 | O7 | O9 | O12 | E  | A3 | O10 | O11 |
|-------------------------------------|----|----|-----|-----|----|----|----|-----|----|----|-----|-----|
| <b>Fucoxanthin</b>                  |    |    |     |     |    |    |    |     |    |    |     |     |
| Fuco <sub>PICO</sub>                | 20 | 20 | 48  | 24  | 4  | 12 | 6  | 5   | 5  | 6  | 3   | 6   |
| Fuco <sub>NANO</sub>                | 39 | 35 | 33  | 22  | 24 | 42 | 22 | 12  | 15 | 17 | 11  | 29  |
| Fuco <sub>MICRO</sub>               | 41 | 45 | 19  | 54  | 72 | 46 | 71 | 83  | 80 | 77 | 86  | 65  |
| <b>Peridinin</b>                    |    |    |     |     |    |    |    |     |    |    |     |     |
| Peri <sub>PICO</sub>                | 0  | 0  | 4   | 2   | 2  | 3  | 3  | 0   | 2  | 0  | 1   | 0   |
| Peri <sub>NANO</sub>                | 62 | 50 | 33  | 31  | 42 | 50 | 23 | 13  | 36 | 38 | 11  | 51  |
| Peri <sub>MICRO</sub>               | 38 | 50 | 63  | 66  | 56 | 47 | 74 | 87  | 63 | 62 | 88  | 49  |
| <b>19'-hexanoyloxyfucoxanthin</b>   |    |    |     |     |    |    |    |     |    |    |     |     |
| Hex-fuco <sub>PICO</sub>            | 6  | 9  | 33  | 33  | 6  | 13 | 15 | 20  | 16 | 9  | 16  | 28  |
| Hex-fuco <sub>NANO</sub>            | 72 | 61 | 33  | 38  | 68 | 68 | 71 | 43  | 47 | 41 | 56  | 64  |
| Hex-fuco <sub>MICRO</sub>           | 22 | 30 | 34  | 29  | 26 | 18 | 14 | 37  | 37 | 50 | 28  | 8   |
| <b>19'-butanoyloxyfucoxanthin</b>   |    |    |     |     |    |    |    |     |    |    |     |     |
| But-fuco <sub>PICO</sub>            | 25 | 31 | 60  | 59  | 12 | 15 | 25 | 29  | 24 | 19 | 20  | 37  |
| But-fuco <sub>NANO</sub>            | 54 | 50 | 22  | 28  | 65 | 60 | 56 | 52  | 46 | 41 | 38  | 49  |
| But-fuco <sub>MICRO</sub>           | 21 | 18 | 18  | 13  | 23 | 25 | 18 | 19  | 31 | 40 | 42  | 14  |
| <b>Alloxanthin</b>                  |    |    |     |     |    |    |    |     |    |    |     |     |
| Allo <sub>PICO</sub>                | 0  | 0  | 24  | 29  | 7  | 11 | 18 | 25  | 27 | 10 | 27  | 12  |
| Allo <sub>NANO</sub>                | 68 | 79 | 35  | 44  | 68 | 73 | 72 | 69  | 60 | 55 | 63  | 80  |
| Allo <sub>MICRO</sub>               | 32 | 21 | 41  | 27  | 25 | 15 | 10 | 6   | 13 | 36 | 10  | 8   |
| <b>Chlorophyll b</b>                |    |    |     |     |    |    |    |     |    |    |     |     |
| Chl <sub>b</sub> <sub>PICO</sub>    | 56 | 34 | 43  | 24  | 30 | 23 | 41 | 53  | 41 | 42 | 23  | 69  |
| Chl <sub>b</sub> <sub>NANO</sub>    | 37 | 55 | 46  | 59  | 45 | 64 | 49 | 45  | 26 | 41 | 36  | 20  |
| Chl <sub>b</sub> <sub>MICRO</sub>   | 7  | 11 | 11  | 17  | 25 | 13 | 11 | 2   | 33 | 18 | 41  | 11  |
| <b>Zeaxanthin</b>                   |    |    |     |     |    |    |    |     |    |    |     |     |
| Zea <sub>PICO</sub>                 | 84 | 86 | 85  | 82  | 28 | 35 | 45 | 54  | 72 | 63 | 65  | 84  |
| Zea <sub>NANO</sub>                 | 15 | 12 | 13  | 18  | 62 | 59 | 50 | 44  | 19 | 30 | 34  | 14  |
| Zea <sub>MICRO</sub>                | 1  | 2  | 2   | 0   | 10 | 7  | 5  | 0   | 10 | 7  | 1   | 2   |
| <b>Divinyl-chlorophyll a</b>        |    |    |     |     |    |    |    |     |    |    |     |     |
| DVChl <sub>a</sub> <sub>PICO</sub>  | 86 | 87 | 86  | 70  | NA | NA | NA | NA  | NA | NA | NA  | NA  |
| DVChl <sub>a</sub> <sub>NANO</sub>  | 13 | 10 | 10  | 13  | NA | NA | NA | NA  | NA | NA | NA  | NA  |
| DVChl <sub>a</sub> <sub>MICRO</sub> | 1  | 3  | 4   | 16  | NA | NA | NA | NA  | NA | NA | NA  | NA  |

103 **Table S5.** Average (mean  $\pm$  SD) integrated biomass over the  $Z_{EL0.01\%}$  with their relative  
 104 contribution to  $TChla_{TOTAL}$  of each phytoplankton chemotaxonomic groups found in the micro-  
 105 , nano- and picophytoplankton size classes (n = 12) over the study area.

| Phytoplankton group    | Integrated biomass [ $mg\ m^{-2}$ ] |                 |                 | Relative contribution to $TChla_{TOTAL}$ [%] |                |               |
|------------------------|-------------------------------------|-----------------|-----------------|----------------------------------------------|----------------|---------------|
|                        | Micro-                              | Nano-           | Pico-           | Micro-                                       | Nano-          | Pico-         |
| Diatoms                | 7.73 $\pm$ 6.91                     | 2.28 $\pm$ 1.65 | 0.43 $\pm$ 0.53 | 20.3 $\pm$ 18.1                              | 6.0 $\pm$ 4.3  | 1.1 $\pm$ 1.4 |
| Haptophytes            | 5.28 $\pm$ 4.26                     | 7.21 $\pm$ 2.74 | 2.46 $\pm$ 1.35 | 13.8 $\pm$ 11.2                              | 18.9 $\pm$ 7.2 | 6.5 $\pm$ 3.5 |
| Cryptophytes           | 0.31 $\pm$ 0.60                     | 0.59 $\pm$ 0.57 | 0.24 $\pm$ 0.23 | 0.8 $\pm$ 1.6                                | 1.5 $\pm$ 1.5  | 0.6 $\pm$ 0.6 |
| Dinoflagellates        | 1.07 $\pm$ 0.94                     | 1.51 $\pm$ 1.41 | 0.05 $\pm$ 0.05 | 2.8 $\pm$ 2.5                                | 4.0 $\pm$ 3.7  | 0.1 $\pm$ 0.1 |
| Chlorophytes           | 0.44 $\pm$ 0.41                     | 1.93 $\pm$ 1.44 | 0.94 $\pm$ 0.65 | 1.2 $\pm$ 1.1                                | 5.1 $\pm$ 3.8  | 2.5 $\pm$ 1.7 |
| Pelagophytes           | 0.62 $\pm$ 0.37                     | 0.82 $\pm$ 0.68 | 1.13 $\pm$ 1.02 | 1.6 $\pm$ 1.0                                | 2.2 $\pm$ 1.8  | 3.0 $\pm$ 2.7 |
| <i>Synechococcus</i>   | 0.18 $\pm$ 0.24                     | 0.19 $\pm$ 0.21 | 0.83 $\pm$ 1.07 | 0.5 $\pm$ 0.6                                | 0.5 $\pm$ 0.5  | 2.2 $\pm$ 2.8 |
| <i>Prochlorococcus</i> | 0.06 $\pm$ 0.10                     | 0.21 $\pm$ 0.38 | 1.64 $\pm$ 2.89 | 0.2 $\pm$ 0.3                                | 0.6 $\pm$ 1.0  | 4.3 $\pm$ 7.6 |

107 **Table S6.** Integrated nutrients concentrations over the  $Z_{EL0.01\%}$ . Stations were grouped  
 108 according to their hydrographic zone and biogeochemical region. Integrated nutrients are  
 109 rounded to the nearest 5 for a better readability.

| St. | Zone | Region    | ∫ Nutrients [mmol m <sup>-2</sup> ] |     |      |
|-----|------|-----------|-------------------------------------|-----|------|
|     |      |           | NO <sub>x</sub>                     | DIP | DSi  |
| O2  | STZ  | LNLC      | 390                                 | 45  | 520  |
| O3  | STZ  | LNLC      | 840                                 | 75  | 775  |
| O16 | STZ  | LNLC      | 720                                 | 70  | 435  |
| O14 | SAZ  | HN-LSi-LC | 1020                                | 85  | 470  |
| O6  | PFZ  | HN-LSi-LC | 3945                                | 270 | 1620 |
| O7  | PFZ  | HN-LSi-LC | 3555                                | 245 | 1080 |
| O9  | PFZ  | HN-LSi-LC | 4260                                | 290 | 1870 |
| O12 | PFZ  | KER (PFZ) | 1760                                | 130 | 270  |
| E   | AZ   | KER (AZ)  | 2380                                | 165 | 1210 |
| A3  | AZ   | KER (AZ)  | 2275                                | 165 | 475  |
| O10 | AZ   | HNLC      | 3480                                | 235 | 1510 |
| O11 | AZ   | HNLC      | 5845                                | 405 | 6025 |

110

111 STZ, Subtropical Zone; SAZ, Subantarctic Zone; PFZ, Polar Frontal Zone; AZ, Antarctic Zone;  
 112 KER, Kerguelen bloom; NO<sub>x</sub> = NO<sub>3</sub><sup>-</sup> + NO<sub>2</sub><sup>-</sup>; DIP, dissolved inorganic phosphorus; DSi,  
 113 dissolved silicon

114

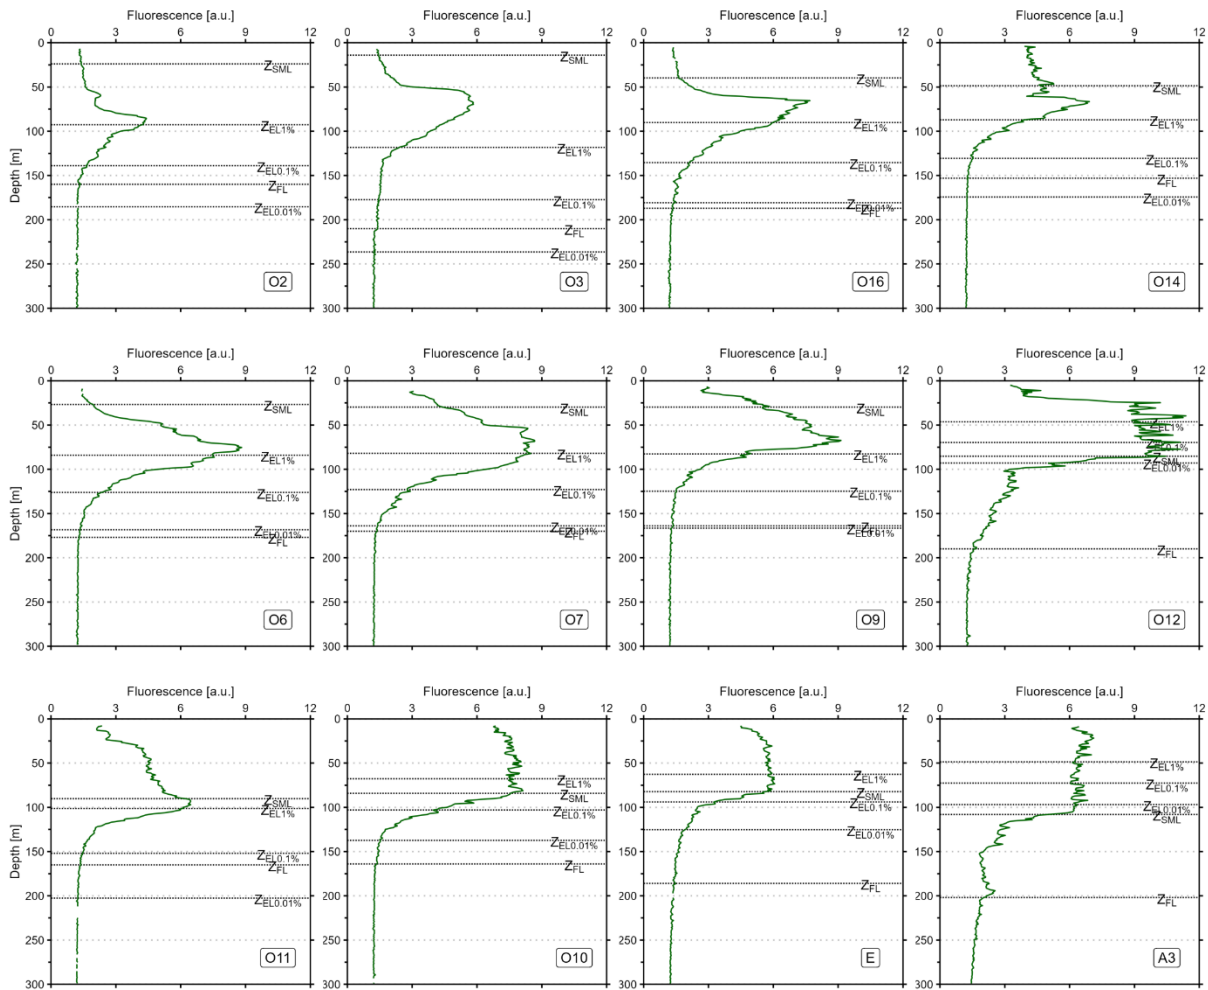

115

116 **Figure S1.** Vertical profiles of fluorescence (arbitrary unit) at the SOCARB stations. The  
 117 dashed lines represent the depth of the surface mixed layer ( $Z_{SML}$ ), the depth of the euphotic  
 118 layer for 1% ( $Z_{EL1\%}$ ), 0.1% ( $Z_{EL0.1\%}$ ) and 0.01% and ( $Z_{EL0.01\%}$ ), and the depth of bottom of the  
 119 fluorescence maximum ( $Z_{FL}$ ).

120

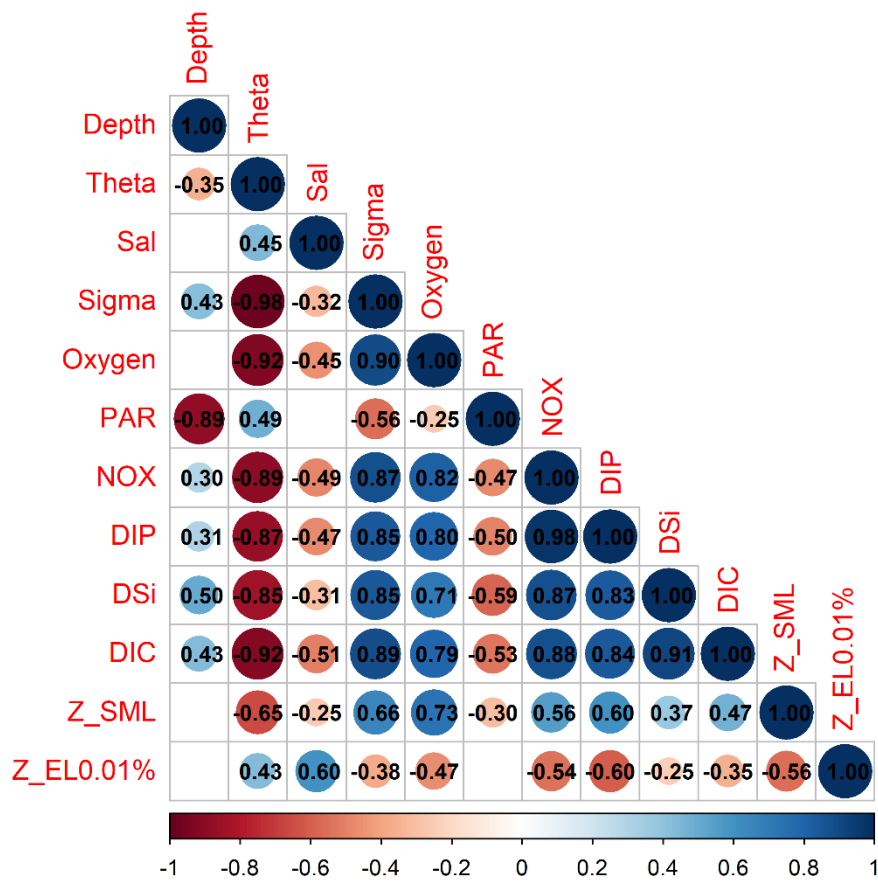

121

122 **Figure S2.** Heatmap of Spearman correlations between environmental variables selected in the  
 123 principal component analysis. Only significant correlations with a threshold of  $p < 0.05$  are  
 124 displayed.

125

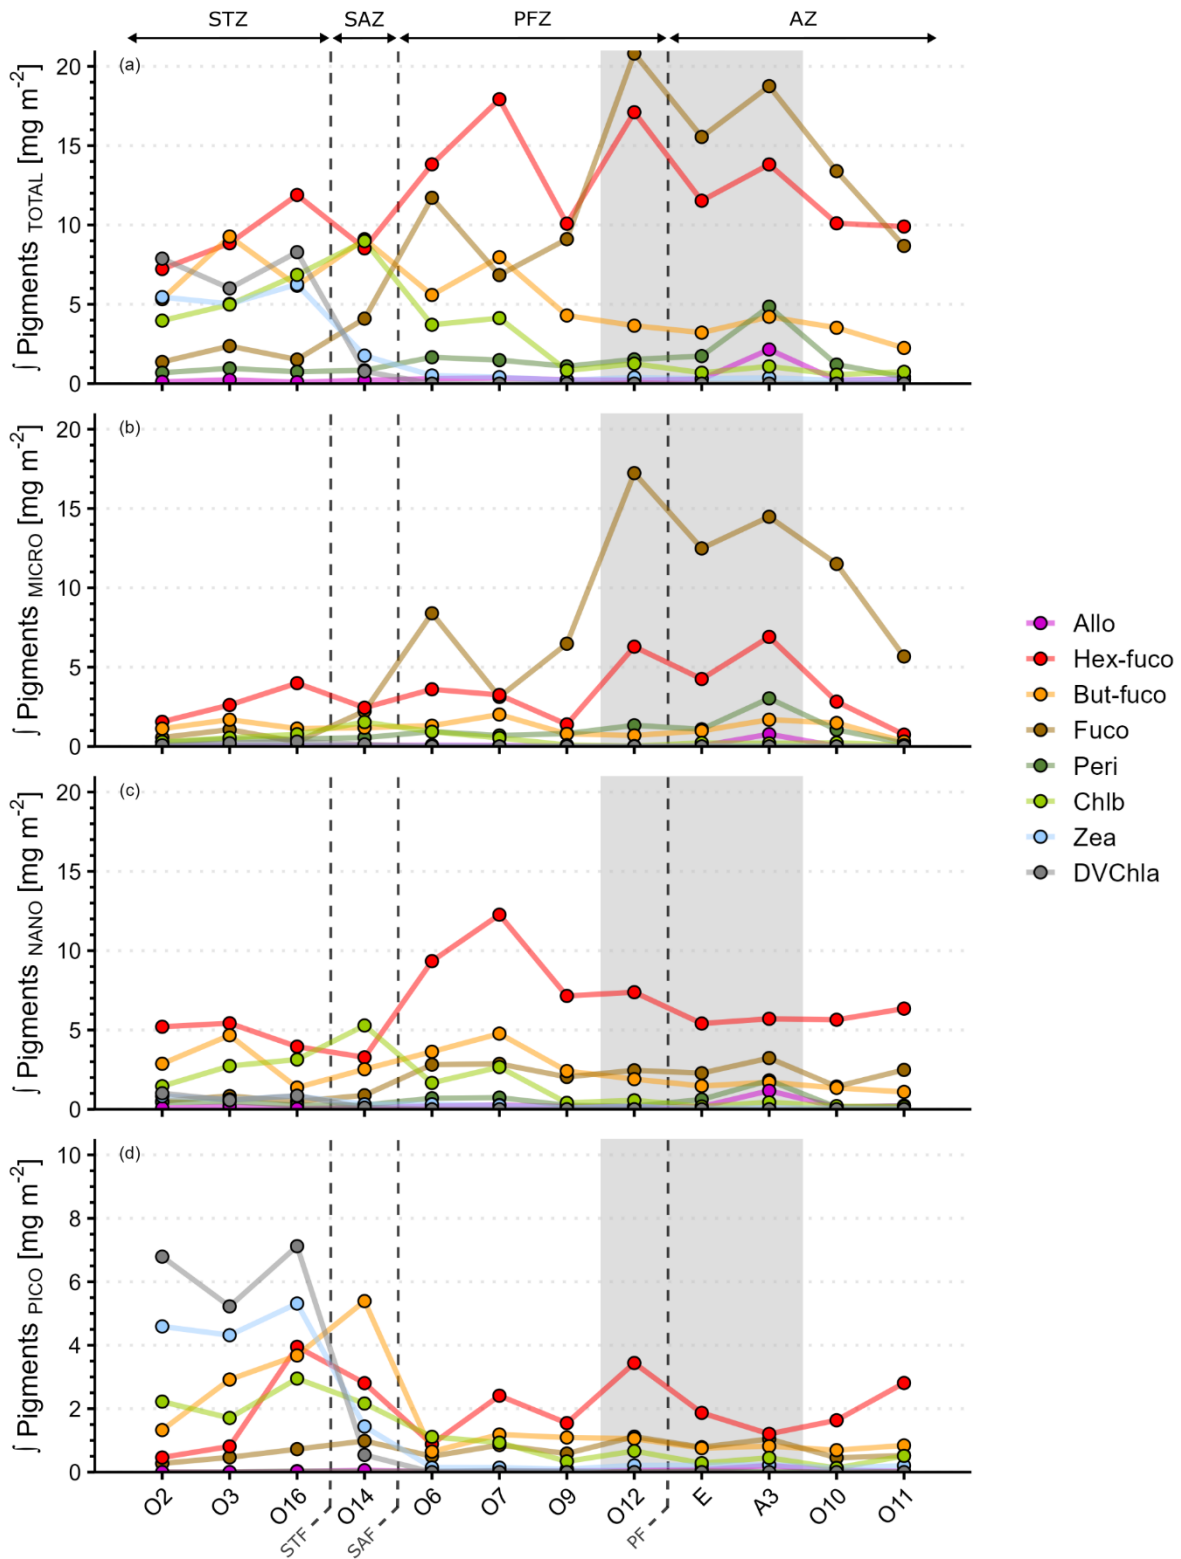

126

127 **Figure S3.** Spatial distribution of the main integrated pigment concentrations ( $\int$  Pigments) over  
 128 the  $Z_{EL0.01\%}$  for (a) the whole community, (b) the micro-, (c) the nano- and (d) the  
 129 picophytoplankton size classes. Mind the y-axis scale differences for the picophytoplankton  
 130 panel compared to the others. Stations were grouped according to their hydrographic zone and  
 131 biogeochemical region. The grey box covers the stations in the Kerguelen region. The dotted

132 lines represent the main Southern Ocean fronts: STF, Subtropical Front; SAF, Subantarctic  
133 Front; PF, Polar Front. STZ, Subtropical Zone; SAZ, Subantarctic Zone; PFZ, Polar Frontal  
134 Zone; AZ, Antarctic Zone.

135

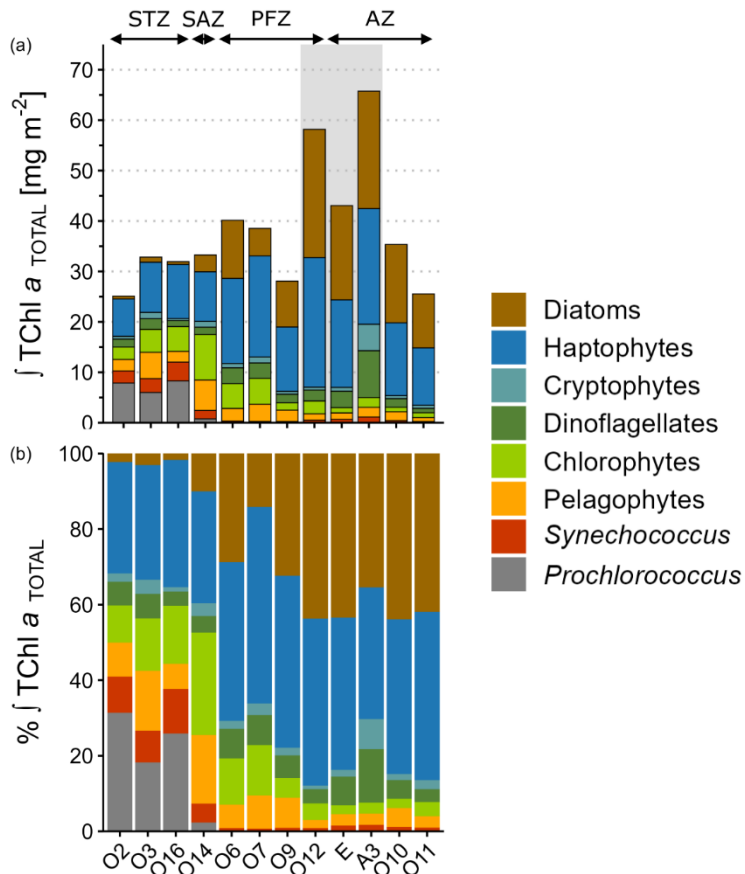

136

137 **Figure S4.** Spatial distribution of phytoplankton taxonomic groups of (a) integrated TChl*a* and  
 138 (b) relative contribution to integrated TChl*a* over the  $Z_{EL0.01\%}$  for the total fraction. Note that  
 139 the total fraction data results from the sum of the phytoplankton chemotaxonomic groups  
 140 biomass for each size class.

141

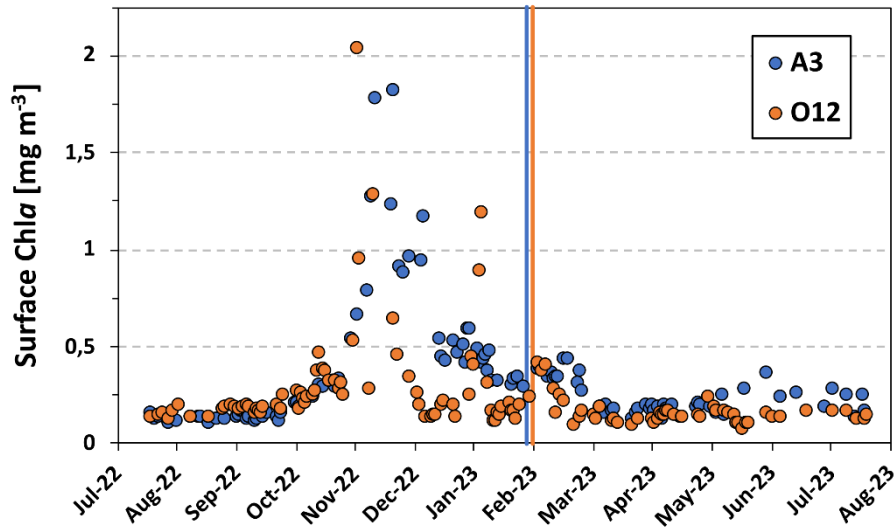

142

143 **Figure S5.** Surface chlorophyll *a* phenology at A3 (blue) and O12 (orange) from Aug. 2022 to  
 144 Aug. 2023 (Copernicus-GlobColour L3 daily satellite product). The horizontal lines represent  
 145 the sampling date for each station.
